# Supplementary material for: Endoreplication Controls Cell Fate Maintenance
Source: PLoS Genet. 2010 Jun 24;6(6):e1000996. doi: 10.1371/journal.pgen.1000996 (PMC2891705; doi:10.1371/journal.pgen.1000996)
Supplement: Table S1 — Trichome numbers and epidermal cell sizes of mature rosette leaves. (0.02 MB XLS) [file pgen.1000996.s004.xls]

## Sheet: Sheet1
	trichomes	sd	aborted	sd	n	cells/0,01 mm2	sd	n	leaf area [mm2]	sd	n	cells/leaf	trichome/cell	aborted/cell
Col-0	89.19	13.28	0	0	31	32.5	10.1	11	9.123	1.96	32	29649	0.00301	0
sim	66.5918	16.723	0	0	18	40.2119	6.5	10	11.1806	6.49	8	44943.6	0.00148163	0
KRP1IM	59.53	8.57	0	0	30	29.6	6.2	10	11.34	0.93	8	33564	0.00177	0
KRP109	65.09	12.59	0	0	32	36.7	7.4	10	8.84	2	8	32433	0.00201	0
KRP1	52.53	9.58	0	0	32	26.3	4.3	10	10.03	2.65	8	26385	0.00199	0
D	31.78	6.22	0	0	32	19.7	4.9	10	7.54	2.14	8	14849	0.00214	0
DE	20.25	4.01	0	0	32	13.8	2.9	10	6.18	1.16	8	8535	0.00237	0
D KRP109	10.81	3.88	0.92	1.02	26	14.6	4.4	10	9.76	2.58	8	14243	0.00076	6e-05
gl3	66.59	13.13	0.02	0.02	32	24.6	7.6	10	10.86	2.43	8	26706	0.00249	0
gl3 KRP1IM	21.47	6.33	10.25	4.3	32	27.5	6.2	10	10.74	4.59	8	29544	0.00073	0.00035
gl3 D	11.66	5.31	4.94	2.41	32	17.4	2.9	10	7.2	2.15	8	12526	0.00093	0.00039
gl3 DE	3.44	3.77	3.09	1.99	32	13.3	3.2	10	6.704	2.19	8	8916	0.00039	0.00035
gl2	3.97	2.09	53.16	14.34	31	30.1	7	10	10.59	3.22	8	31870	0.00012	0.00167
gl2 KRP1IM	3.22	2.98	38.34	9.24	32	30.9	6.6	10	10.74	4.59	8	33197	0.0001	0.00115
gl2 D	0.31	0.54	17.94	4.83	32	16.3	3.3	10	9.75	2.15	8	15899	2e-05	0.00113
gl2 DE	0	0	6.06	6.91	16	14.5	3.9	10	5.23	2.65	8	7578	0	0.0008
gl2 gl3	0	0	1.87	1.59	31	29.2	5.5	10	8.15	1.96	8	23783	0	8e-05
CCS gl2 gl3	0	0	64.16	16.46	32	28.9	6.2	10	8.86	2.03	32	25600	0	0.00251
